# Supplementary material
Source: MDPI journal article supplement (https://www.mdpi.com/2073-4441/15/7/1382)
Supplement: s1 [file s1]

## Supplementary material

### “The role of estuarine wetlands (saltmarshes) in sediment microplastics retention”

C. Marisa R. Almeida<sup>1,2,\*</sup>, Iraide Sáez-Zamacona<sup>1,3</sup>, Diogo Silva<sup>1,3</sup>, Sabrina M. Rodrigues<sup>1,3</sup>, Ruben Pereira<sup>1,3</sup> and Sandra Ramos<sup>1,\*</sup>

<sup>1</sup> CIIMAR, Interdisciplinary Centre of Marine and Environmental Research, University of Porto, Portugal

<sup>2</sup> Chemistry and Biochemistry Department, Faculty of Sciences of University of Porto, Portugal

<sup>3</sup> ICBAS, Abel Salazar Institute of Biomedical Sciences, University of Porto, Portugal

\* Correspondence: calmeida@ciimar.up.pt (CMRA), Tel.: +351 223401822; ssramos@ciimar.up.pt (SR), Tel.: +351 2234101811

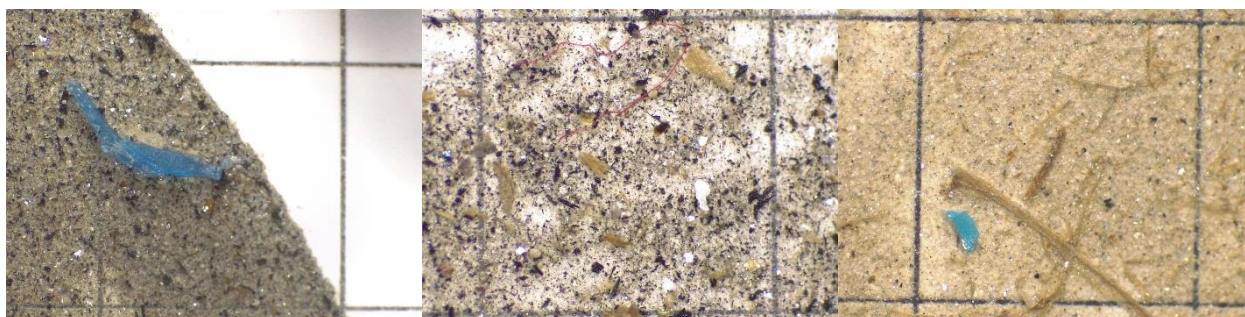

**Figure S1** – Examples of MPs (blue fragments and red fibre) observed in sediment samples

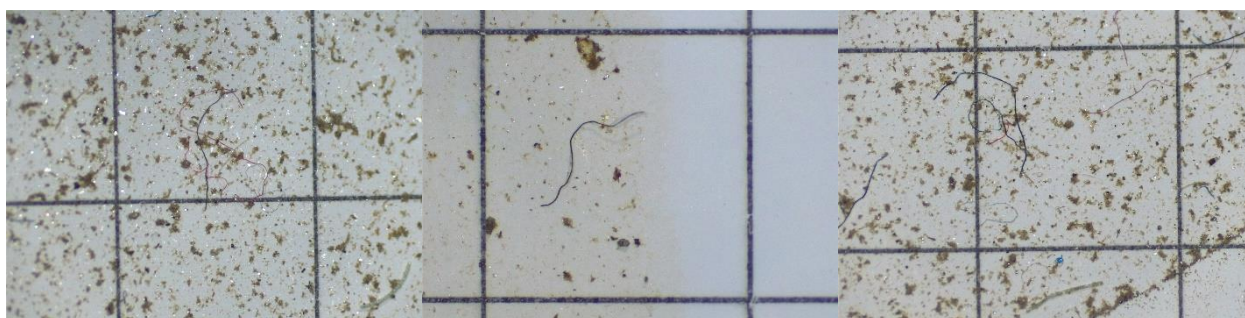

**Figure S2** – Examples of MPs (fibres) observed in water samples
